# Supplementary material for: Experimental Evolution of Metabolic Dependency in Bacteria
Source: PubMed Central journal article supplement (PMC5096674; doi:10.1371/journal.pgen.1006364), 2016-11-04
Supplement: pgen.1006364.s006.pdf [file pgen.1006364.s006.pdf]

**S3 Table. Genotypic and phenotypic characteristics of sequenced auxotrophic and prototrophic genotypes.** The genomic features are also illustrated in Fig. 5. *Strain identity* code: X-Y-Z where X refers to a particular population (1-8), Y refers to the regime, i.e. AA = amino acid, or NA = no amino acid, and Z refers to the phenotype, i.e. either AT = auxotrophic or PT = prototrophic.

| Strain identity | Genotype                                                                                                                                                                                | Amino acid auxotrophies                                                                            |
|-----------------|-----------------------------------------------------------------------------------------------------------------------------------------------------------------------------------------|----------------------------------------------------------------------------------------------------|
| 2-AA-AT         | <i>ptsP</i> (M604R), <i>yoaA</i> (D121Y), <i>insF1-mdtB</i> ( $\Delta$ 13,852 bp)                                                                                                       | Arg, Asn, Asp, Cys, Gly, His, Phe, Ser, Thr, Val                                                   |
| 3-AA-AT         | <i>hemF</i> (G127V), <i>dhaM</i> (V196A), <i>rph</i> (-82 bp)                                                                                                                           | Ala, Arg, Asn, Asp, Cys, Gln, Glu, Gly, His, Ile, Leu, Lys, Met, Phe, Pro, Ser, Thr, Trp, Tyr, Val |
| 4-AA-AT         | <i>rph</i> (-82 bp), <i>yfjM</i> / <i>yfjL</i> [(CATAGTGC) $6 \rightarrow 7$ ], <i>cra</i> / <i>ilvH</i> (C $\rightarrow$ T)                                                            | Arg, Asn, Asp, Cys, Gln, Gly, His, Phe, Ser & Thr                                                  |
| 5-AA-AT         | <i>rph</i> / <i>pyr</i> (-1 bp), <i>sspA</i> (Q24*), <i>gltD</i> N354D, <i>crr</i> / <i>ptsI</i> (A $\rightarrow$ C)                                                                    | Arg, Asn, Asp, Cys, Gln, Gly, His, Phe, Ser, Thr, Val                                              |
| 6-AA-AT         | <i>gltD</i> (N354D), <i>stpA</i> (R49S), <i>rcnR</i> / <i>thiM</i> (A $\rightarrow$ G), <i>wcaN</i> (-1 bp), <i>uspC</i> / <i>flhD</i> (+4 bp), <i>ykcC-proB</i> ( $\Delta$ 13,518 bp); | Pro                                                                                                |
| 8-AA-AT         | <i>yhdW</i> (C $\rightarrow$ A), <i>gltD</i> (N354D), <i>rcnR</i> / <i>thiM</i> (A $\rightarrow$ G), <i>wzxC</i> / <i>wcaK</i> (+85 bp),                                                | Gly                                                                                                |
| 7-NA-AT         | <i>yqiB</i> (Q117K), <i>rpoB</i> (T135P)                                                                                                                                                | Lys, Trp                                                                                           |
| 8-NA-AT         | <i>yqiB</i> (Q117K), <i>rpoB</i> (T135P), <i>metG</i> (R600P), <i>dxr/frr</i> (T $\rightarrow$ A), <i>ynaE/pinR</i> (A $\rightarrow$ G)                                                 | Lys, Trp                                                                                           |
| 3-AA-PT         | <i>rph</i> / <i>pyr</i> (-1 bp), <i>cra</i> (L191F)                                                                                                                                     | NA                                                                                                 |
| 4-AA-PT         | <i>rph</i> / <i>pyr</i> (-1 bp), <i>cra</i> (L191F)                                                                                                                                     | NA                                                                                                 |
| 5-AA-PT         | <i>rpsK</i> (I116N), <i>gltD</i> (N354D), <i>crr/ptsI</i> (A $\rightarrow$ C), <i>rcnR/thiM</i> (A $\rightarrow$ G)                                                                     | NA                                                                                                 |
| 6-AA-PT         | <i>rph</i> (-82 bp), <i>fecR</i> (A12G), <i>hflC</i> (G268D), <i>gltD</i> (N354D), <i>rcnR/thiM</i> (A $\rightarrow$ G)                                                                 | NA                                                                                                 |
| 7-NA-PT         | <i>wzxC/wcaK</i> (+85 bp)                                                                                                                                                               | NA                                                                                                 |
| 8-NA-PT         | <i>rph</i> / <i>pyr</i> (-1 bp), <i>wzxC/wcaK</i> (+85 bp), <i>mppA/pgrR</i> (IS5 +4 bp)                                                                                                | NA                                                                                                 |
