# Supplementary material for: Experimental Evolution of Metabolic Dependency in Bacteria
Source: PubMed Central journal article supplement (PMC5096674; doi:10.1371/journal.pgen.1006364), 2016-11-04
Supplement: pgen.1006364.s007.pdf [file pgen.1006364.s007.pdf]

**S4 Table. Strains used in this study.** Abbreviations: Ara<sup>+/-</sup> = ability to use arabinose as a carbon source present/ absent, WT = wild type.

| Strain                                           | Genotype                                                                                                                                                  | Reference  |
|--------------------------------------------------|-----------------------------------------------------------------------------------------------------------------------------------------------------------|------------|
| <i>Escherichia coli</i> BW25113 Ara <sup>-</sup> | F <sup>-</sup> , Δ <i>araD-araB567</i> , Δ <i>lacZ4787::rrnB-3</i> , λ <sup>-</sup> , <i>rph-1</i> , Δ <i>rhaD-rhaB568</i> , <i>hsdR514</i>               | [1]        |
| <i>Escherichia coli</i> BW25113 Ara <sup>+</sup> | F <sup>-</sup> , Δ <i>araD-araB567</i> , Δ <i>lacZ4787::rrnB-3</i> , λ <sup>-</sup> , <i>rph-1</i> , Δ <i>rhaD-rhaB568</i> , <i>hsdR514</i> , <i>araA</i> | [2]        |
| <i>insF1- mdtB</i>                               | WT Ara <sup>-</sup> , Δ <i>insF1- mdtB</i>                                                                                                                | This study |
| <i>ptsP</i>                                      | WT Ara <sup>-</sup> , <i>ptsP</i> : M604R                                                                                                                 | This study |
| <i>yoaA</i>                                      | WT Ara <sup>-</sup> , <i>yoaA</i> : D121Y                                                                                                                 | This study |
| <i>hemF</i>                                      | WT Ara <sup>-</sup> , <i>hemF</i> : G127V                                                                                                                 | This study |
| <i>sspA</i>                                      | WT Ara <sup>-</sup> , <i>sspA</i> : Q24*                                                                                                                  | This study |
| <i>stpA</i>                                      | WT Ara <sup>-</sup> , <i>stpA</i> :R49S                                                                                                                   | This study |
| <i>uspC / flhD</i>                               | WT Ara <sup>-</sup> , <i>uspC / flhD</i> : +4 bp                                                                                                          | This study |
| <i>wcaN</i>                                      | WT Ara <sup>-</sup> , <i>wcaN</i> : -1 bp                                                                                                                 | This study |
| <i>ykfC – proB</i>                               | WT Ara <sup>-</sup> , Δ <i>ykfC - proB</i>                                                                                                                | This study |
| <i>yhdW</i>                                      | WT Ara <sup>-</sup> , <i>yhdW</i> : C→A                                                                                                                   | This study |
| <i>rpoB</i>                                      | WT Ara <sup>-</sup> , <i>rpoB</i> :T135P                                                                                                                  | This study |
| <i>yqiB</i>                                      | WT Ara <sup>-</sup> , <i>yqiB</i> : Q117K                                                                                                                 | This study |
| <i>ynaE / pinR</i>                               | WT Ara <sup>-</sup> , <i>ynaE / pinR</i> : A→G                                                                                                            | This study |

## References:

1. Baba T, Ara T, Hasegawa M, Takai Y, Okumura Y, et al. Construction of *Escherichia coli* K-12 in-frame, single-gene knockout mutants: the Keio collection. Mol Sys Biol. 2006; 2:2006.0008.
2. D'Souza G, Waschina S, Pande S, Bohl K, Kaleta C, et al. Less is more: Selective advantages can explain the prevalent loss of biosynthetic genes in bacteria. Evolution. 2014; 68: 2559 - 2570.
